# Modelling the positive testing rate of COVID-19 in South Africa Using A Semi-Parametric Smoother for Binomial Data

Olajumoke Evangelina Owokotomo<sup>1\*</sup>, Samuel Manda<sup>2\*</sup>, Adetayo Kasim<sup>3</sup>, Jurgen Claesen<sup>1</sup>, Ziv Shkedy<sup>1+</sup> and Tarylee Reddy<sup>2+</sup>.

<sup>1</sup>Data Science Institute, Center for Statistics, I-BioStat, Hasselt University,  
B 3590 Diepenbeek, Belgium,

<sup>2</sup>Biostatistics Research Unit at South African Medical Research Council South Africa,

<sup>3</sup>Department of Anthropology & Durham Research Methods Centre, Durham University, UK,

\*Joint first author, +Joint last author

## Abstract

The current outbreak of COVID-19 is a major pandemic that has shaken up the entire world in a short time. South Africa has the highest number of COVID-19 cases in Africa and understanding the country's disease trajectory is important for government policy makers to plan the optimal COVID-19 intervention strategy. The number of cases is highly correlated with the number of COVID-19 tests undertaken. Thus, current methods of understanding the COVID-19 transmission process in the country based only on the number of cases can be misleading. In light of this, we propose to estimate both the probability of positive cases per tests conducted (the positive testing rate) and the rate in which the positive testing rate changes over time (its derivative) using a flexible semi-parametric model.

We applied the method to the observed positive testing rate in South Africa with data obtained from March 5th to September 2nd 2020. We found that the positive testing rate was declining from early March when the disease was first observed until early May where it kept on increasing. In the month of July 2020, the infection reached its peak then it started to decrease again indicating that the intervention strategy is effective. From mid August, 2020, the rate of change of the positive testing rate indicates that decline in the positive testing rate is slowing down, suggesting that a less effective intervention is currently implemented.

*Keywords:* COVID-19; South Africa; Number of tests; Infection rate; Positive testing rate; Smoothing Binary data.

# 1 Introduction

Coronaviruses are a large family of viruses which may cause respiratory infections ranging from the common cold to more severe diseases such as Middle East Respiratory Syndrome (MERS) and Severe Acute Respiratory Syndrome (SARS). The ongoing outbreak of the novel coronavirus (SARS-CoV-2) was first detected on 31st December 2019 in Wuhan, China (World Health Organisation, 2020). The virus has rapidly spread with a total of 37,423,660 confirmed cases and 1,074,817 deaths as of 12th October 2020 (World Health Organisation, 2020).

The first COVID-19 case in South Africa was reported on March 5th 2020. By October 12th, 2020, South Africa had the highest burden of COVID-19 cases in the African region with 692,471 reported cases and 17,780 confirmed COVID-19 related deaths (World Health Organisation, 2020). The South African government declared a national state of disaster on March 15th 2020 and commenced a state of lockdown from March 26th 2020 in an effort to reduce COVID-19 transmission in the country (Reddy et al., 2020). During this period all international and inter-provincial borders were closed, as well as the education sector and several economic sectors in the country. As of June 2020, the country adopted a COVID-19 risk-adjusted strategy with a phased re-opening of selected economic sectors and schools.

Modeling the number of COVID-19 cases and in particular producing a reliable short and long term prediction for the number of COVID-19 cases become a central tool for policy makers to design intervention strategies in order to control the disease's spread. Recently, (Reddy et al., 2020) proposed a robust model based approach, that does not require to make assumptions about the transmission process to model the number of COVID-19 cases and to provide a short term prediction for 5-10 days ahead. These non-linear epidemiological models have previously been applied to model other disease outbreaks such as Ebola (Chowell et al., 2019), Dengue (Hsieh and Chen, 2009), Zika virus (Sebrango-Rodríguez et al., 2017) and, more recently, the COVID-19 pandemic (Roosa et al., 2020); (Shen, 2020); (Tariq et al., 2020). Specifically, Roosa et al. (2020) fitted the generalized logistic model, Richards's model and a sub-epidemic model to the cumulative COVID-19 cases in the Hubei province of China and produced a short-term forecast of 5, 10 and 15 days ahead. The authors also expanded on this work for the province of Guangdong. In the recent anal-

59 ysis by [Shen \(2020\)](#), a similar approach was taken to estimate the key epidemic parameters for all  
60 11 provinces in China as well as 9 selected countries.

61 All models discussed above made use of the daily or cumulative number of cases to estimate the  
62 models and the parameters of interest. In the context of COVID-19, this introduces a difficulty as  
63 seen in Figure 1, since in South Africa (and many other countries) the number of tests and number  
64 of cases are correlated ([Reddy et al., 2020](#)).

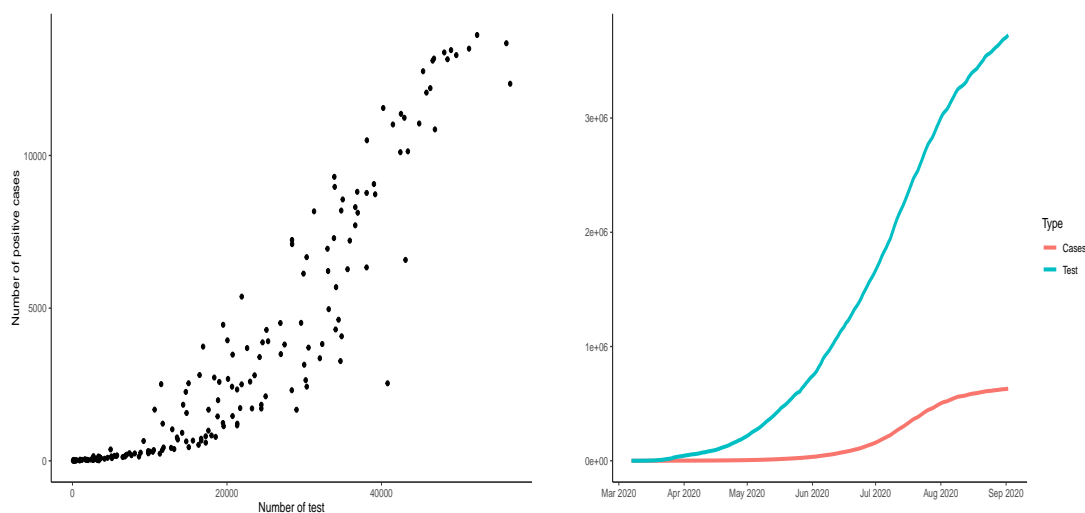

Figure 1: Panel a: Relationship between the daily number of tests and the daily number of positive cases. Panel b: The total number of cases and total number of COVID-19 tests carried out between the period March 7th 2020 and September 2nd 2020. Spearman's rank correlation between the number of tests to the number of cases is equal to 0.9632752, ( $p$ -value  $< 2.2e-16$ ).

65 Positive testing rate, i.e., the probability of positive case among the total number of tests,  
66 has been seen as an important metrics in understanding the transmission of COVID-19 in the lit-  
67 erature ([Our world in Data, 2020](#)). Due to the correlation (dependence) of the number of cases on  
68 the number of tests conducted, no country knows the actual total number of people infected with  
69 COVID-19 but only the infection status of those who have been tested. Therefore, in countries  
70 with a high positive rate, the number of confirmed cases is more likely to represent only a small  
71 proportion of the true number of cases. However, when the positive rate increases it can suggest the  
72 virus is actually spreading faster than the growth seen in confirmed cases. On May 12, 2020 the  
73 World Health Organization (WHO) advised governments that before relaxing intervention mea-  
74 sures, rates of positively in testing should remain at 5% or lower for at least 14 days (John Hopkins

75 coronavirus resource center,2020, WHO, 2020).

76 To overcome the problem that the number of cases depends on the number of tests, we propose an  
77 alternative modeling approach that focuses on COVID-19 positive testing rate, i.e., the probabilit-  
78 ity of positive cases per tests conducted. In this paper we model the daily number of COVID-19  
79 cases among the number of tests carried out using a semi-parametric model in which the rate of  
80 change of the positive testing rate is estimated using a smooth function of time. In particular, we  
81 apply scatterplot smoothing techniques for binomial data using generalized additive models in or-  
82 der to obtain an estimate of the rate of change [Ruppert et al. \(2003\)](#). In Section 2 we describe the  
83 testing policy in South Africa from which the data used for the analysis presented in this paper  
84 was obtained. The modelling approach, the model formulation for the positive testing rate and the  
85 methodology to construct simultaneous confidence bands are discussed in Section 3. Section 4  
86 contains the results, and the discussions and conclusions are in Section 5.

## 87 **2 Data**

### 88 **2.1 Daily number of tests and confirmed cases**

89 The daily number of reported COVID-19 cases and tests for the period of March 7th 2020 to  
90 September 2nd 2020 is presented in Figure 2. The growth of COVID-19 infections in South Africa  
91 appears to be tri-phasic especially during the early phase when the cumulative cases were low with  
92 rapid growth until March 27th 2020. A total of 243 daily new cases were observed, followed by a  
93 sharp decline in the rate of new cases. From March 28th 2020 to April 6th 2020 the daily increase  
94 in cases was consistently below 100. From May 2020 onwards, a consistent increase of more than  
95 1000 cases per day were observed. The peak period was between of July 9th and 19th where more  
96 than 10,000 reported cases were reported on a daily basis. As of July, a total of 3726721 tests had  
97 been conducted, corresponding to a testing rate of 22.816 per 1000 population. Throughout this  
98 period, the proportion of infections increased until mid July when it started to decrease.

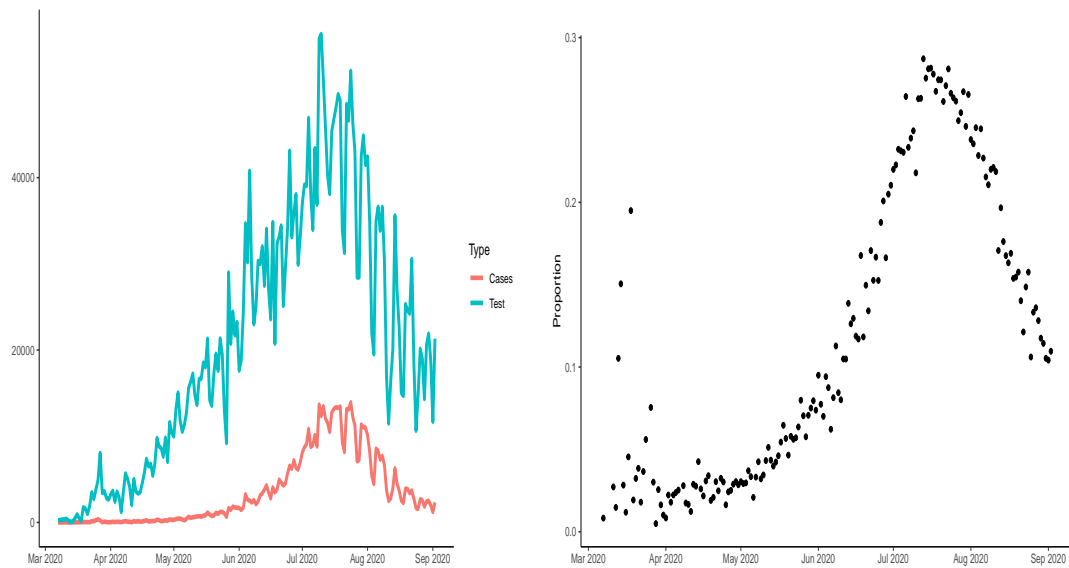

Figure 2: Panel a: Daily number of cases and daily number of COVID-19 tests between March 7th, 2020 and September 2nd, 2020. Panel b: Positive testing rate.

## 99 2.2 Testing policy in South Africa

100 A total of 3,245,087 tests for SARS-COV-2 were conducted between March 1st and August 29th  
101 2020. These tests were performed on individuals who satisfied the case definition for persons under  
102 investigation (PUI). The PUI definition, which was amended consistently included at least one of  
103 the following criteria: symptomatic individuals seeking testing, hospitalized individuals for whom  
104 testing was done, individuals in high-risk occupations (e.g health care workers), individuals in out-  
105 break settings, and individuals identified through community screening and testing programmes  
106 which were implemented between April and the middle of May 2020. The number of tests per-  
107 formed on a weekly basis increased from March 2020 until the third week of May and proceeded  
108 to decrease over the subsequent two weeks due to a limited supply of testing kits. The average  
109 time elapsed from specimen collection to testing was under two days in both the private and public  
110 sectors from August 22th to 29th August 2020.

## 111 **3 Modeling COVID-19 infection rate in South Africa using Gen-** 112 **eralized Linear Mixed Effects Model for Binary Data**

### 113 **3.1 Model formulation for the positive testing rate**

114 The number of positive cases is assumed to be binomially distributed. Let  $\pi_t$  be the daily positive  
115 testing rate per test,  $Y_t$  be the daily number of cases and  $n_t$  be the daily number of tests. Our aim is  
116 to model the probability  $\pi_t$  and to produce a model-based estimate for its first derivative, i.e., the  
117 change in the positive testing rate over time. Semi-parametric regression model for binomial data  
118 was used to provide an estimate of the positive testing rate as a function of time. The relationship  
119 can be expressed as

$$Y_t \sim \text{Bin}(n_t, \pi_t), \quad t = 1, \dots, T, \\ \text{logit}(\pi_t) = f(t). \quad (1)$$

120 Here,  $f(t)$  is a smooth function of the time  $t$ . Smoothing splines are commonly used for this  
121 purpose (Ruppert et al. (2003)). A general spline model of degree  $d$  with  $K$  knots can be written  
122 as follows:

$$\text{logit}(\pi_t) = \beta_0 + \beta_1 x_i + \dots + \beta_d x_i^d + \sum_{k=1}^K u_k s_k(x_i), \quad (2)$$

123 where  $s_k(x)$  is a set of spline basis functions.

124 To avoid overfitting, the spline model is typically estimated by considering penalized max-  
125 imum likelihood estimation, with a penalty term of the form  $\lambda \sum_k u_k^2$ . Ruppert et al. (2003) showed  
126 that the penalized regression problem can be expressed as an equivalent generalized linear mixed-  
127 effects model (GLMM):

$$\text{logit}(\pi) = \mathbf{X}\beta + \mathbf{Z}\mathbf{u}, \quad (3)$$

128 with  $\pi = [\pi_1, \pi_2, \dots, \pi_T]^T$ ,  $\beta = [\beta_0, \beta_1, \dots, \beta_d]^T$ , and  $\mathbf{u} = [u_1, u_2, \dots, u_K]^T$ . Note that  $\beta$  and  $\mathbf{u}$  are  
129 vectors of the fixed and random effects, respectively, with  $u_k \sim \mathcal{N}(0, \sigma_u^2)$  where  $\sigma_u^2$  acts as the  
130 smoothing parameter. This representation has the advantage that the degree of smoothing can be  
131 estimated from the data using standard mixed-model software (e.g., Ruppert et al. (2003), chapter

132 4). The design matrices  $\mathbf{X}$  and  $\mathbf{Z}$  are defined as follows:

$$\mathbf{X} = \begin{bmatrix} 1 & x_1 & \dots & x_1^d \\ 1 & x_2 & \dots & x_2^d \\ \vdots & \vdots & \ddots & \vdots \\ 1 & x_T & \dots & x_T^d \end{bmatrix}$$

133 and

$$\mathbf{Z} = \begin{bmatrix} s_1(x_1) & s_2(x_1) & \dots & s_K(x_1) \\ s_1(x_2) & s_2(x_2) & \dots & s_K(x_2) \\ \vdots & \vdots & \ddots & \vdots \\ s_1(x_T) & s_2(x_T) & \dots & s_K(x_T) \end{bmatrix}.$$

134 The estimation of the model (3) is performed by means of penalized quasi-likelihood (PQL). Initial  
135 estimates for  $\boldsymbol{\beta}$  and  $\mathbf{u}$  are used to calculate the pseudo-data  $\mathbf{y}^*$ :

$$\mathbf{y}^* = \mathbf{X}\boldsymbol{\beta} + \mathbf{Z}\mathbf{u} + \mathbf{W}^{-1}(\mathbf{y} - \boldsymbol{\pi}) \equiv \mathbf{X}\boldsymbol{\beta} + \mathbf{Z}\mathbf{u} + \boldsymbol{\varepsilon}^*, \quad (4)$$

136 where  $\mathbf{W}$  is a diagonal matrix with variances of  $y_i$  on the diagonal. The pseudo-error  $\boldsymbol{\varepsilon}^*$   
137 has a variance-covariance matrix  $\mathbf{R} = \mathbf{W}^{-1}\phi$ , where  $\phi$  is the dispersion parameter, equal to one for  
138 the standard binomial model family. Equation (4) resembles a linear mixed-effects model (LMM)  
139 formulation for  $\mathbf{y}^*$ . Thus, an LMM is fitted to the pseudo-data, yielding updated estimates of  $\boldsymbol{\beta}$ ,  
140  $\mathbf{u}$ ,  $\sigma_u^2$ , and  $\phi$ . The procedure of calculating pseudo-data and re-fitting the LMM is repeated until  
141 convergence.

### 142 3.2 Estimating the derivative for $\pi_t$

143 Once the positive testing rate,  $\pi_t$ , is estimated according to Equation (1) we can estimate the rate  
144 of change in the positive testing rate over time using the derivative of  $\pi_t$  given by

$$\pi_t' = \frac{\pi_{(t)} - \pi_{(t-1)}}{\Delta(t)}. \quad (5)$$

145 Note that if the number of tests is constant over time and applied to a random sample of the  
146 population,  $\pi_t'$  can give an indication to the change in the virus' transmission in the population  
147 (since in this case, it is gives the change in transmission probability). However, it is unlikely to

148 assume that the number of tests will be constant nor that the tests will be applied to random sample  
149 from the population. Also in this case, the derivative can provides a good indication about the  
150 general trend of the virus' transmission for the tested population and can be used as a tool to asses  
151 the success of an implemented intervention strategy.

### 152 3.3 Construction of pointwise confidence band

153 According to [Ruppert et al. \(2003\)](#), an approximate  $100(1-\alpha)\%$  pointwise confidence band for an  
154 estimated penalized spline in the GLMM framework,  $\hat{f}(x)$ , is given by:

$$\hat{f}(x) \pm z_{1-\alpha/2} \times \widehat{\text{st.dev}}\{\hat{f}(x) - f(x)\}, \quad (6)$$

155 where

$$\widehat{\text{st.dev}}\{\hat{f}(x) - f(x)\} = \sqrt{C_x \hat{Q} C_x^T}, \quad (7)$$

156 with  $C_x = \left(1 \ x \ \dots \ x^d \ s_1(x) \ \dots \ s_K(x)\right)$  and

$$\hat{Q} = \widehat{\text{cov}} \begin{bmatrix} \hat{\beta} \\ \hat{u} - u \end{bmatrix} = (C^T \hat{R}^{-1} C + 1/\hat{\sigma}_u^2 D)^{-1}, \quad (8)$$

157 where  $C = [XZ]$  and  $D \equiv \text{diag}([0_{d+1}^T, 1_K^T])$

158 Pointwise confidence bands, however, need to be corrected for multiplicity. Also, they  
159 ignore serial correlation. Therefore, we make use of simultaneous confidence bands implemented  
160 in [Claesen et al. \(2013\)](#), which allow to make joint statements on multiple locations of the fitted  
161 curve. A  $100(1-\alpha)\%$  simultaneous confidence band for  $\hat{f}_x$  is defined as:

$$\hat{f}_x \pm c_{1-\alpha} \times \widehat{\text{st.dev}}\{\hat{f}(x) - f(x)\} \quad (9)$$

162 where the critical value,  $c_{1-\alpha}$ , is the  $(1-\alpha)$  quantile of the random variable

$$\sup_{x \in \mathcal{X}} \left| \frac{\hat{f}(x) - f(x)}{\widehat{\text{st.dev}}\{\hat{f}(x) - f(x)\}} \right| \approx \max_{1 \leq l \leq M} \left| \frac{\left( C_x \begin{bmatrix} \hat{\beta} - \beta \\ \hat{u} - u \end{bmatrix} \right)_l}{\widehat{\text{st.dev}}\{\hat{f}(x_l) - f(x_l)\}} \right|,$$

163 which can be found by simulating from an approximate multivariate normal distribution



## 164 4 Application to the data

165 A generalized additive model was fitted to the data with the time component was used as the  
166 smooth term. The model was fitted using the `gam()` function of the `mgcv` (Wood, 2017) library in R  
167 (R Core Team, 2020). Figure 3, shows that the estimated positive testing rate peaked on July 19th,  
168 2020, at the same time that the number of tests was at its highest level. From that time onward,  
169 both number of tests and the positive testing rate declined. This could be a result of a reduction of  
170 the virus' transmission in the population or a result of a change in the population to which the tests  
171 were applied.

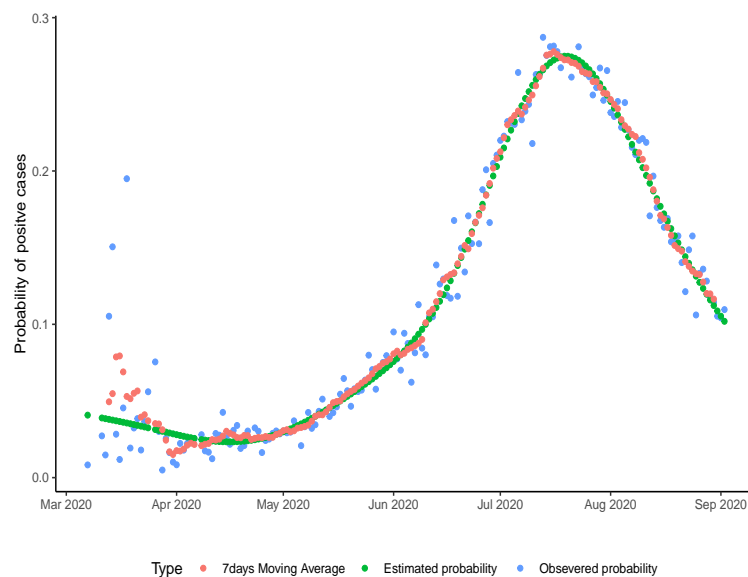

Figure 3: Observed proportion of infection over time, the estimated probability and the 7 days moving average of positive testing rate.

172 A commonly used measure in understanding COVID-19 transmission rate is the moving  
173 average. A 7 days moving average for the positive testing rate was also estimated and this gave a  
174 similar evolution pattern as the estimated positive testing rate.

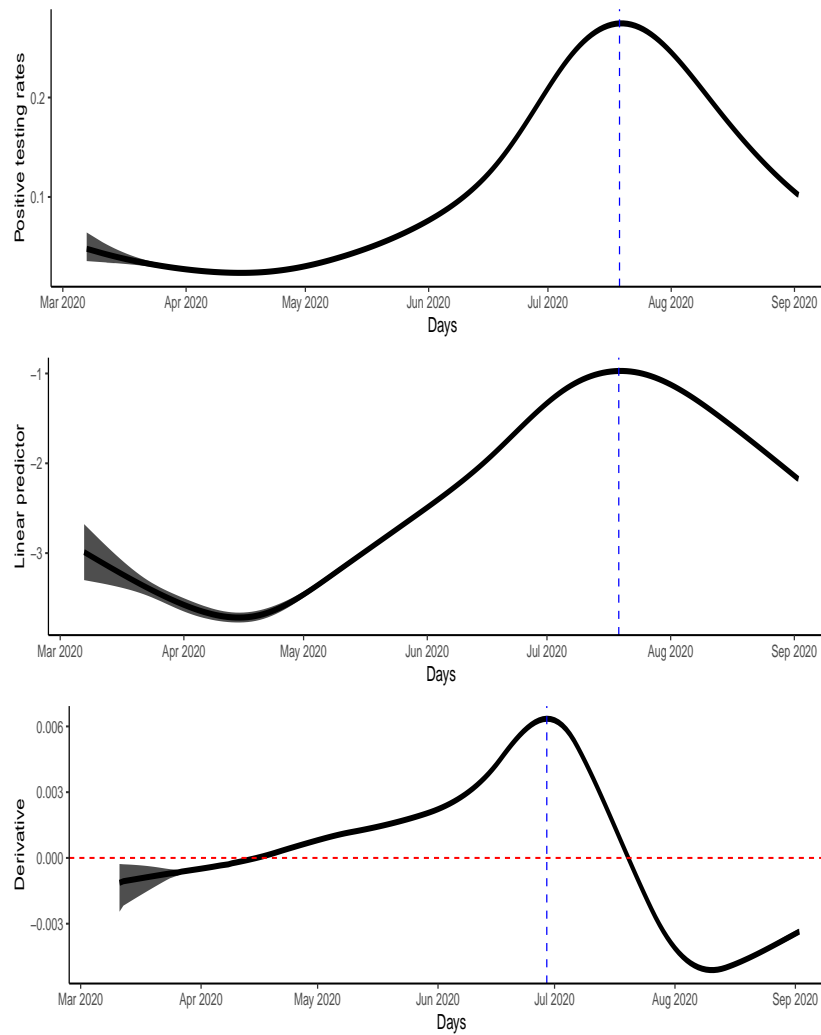

Figure 4: Upper panel: Estimated positive testing rate with 95% simultaneous confidence band. Middle panel: The linear predictor of the smoother with 95% simultaneous confidence band. Lower panel: The derivative of the estimated probability with 95% simultaneous confidence band.

175 From July 19 onward, the change in positive testing rate (the derivative plot presented in  
176 upper part of Figure 4) is negative (indicating decline in the positive testing rate) but from August,  
177 11, 2020, the derivative begins to increase. This could suggest a change in the transmission trend  
178 and an increasing number of positive cases.

## 179 **5 Discussion**

180 In view of the existing healthcare challenges in South Africa, reliable and accurate knowledge  
181 about the positive testing rate of COVID-19 is important to ensure prediction of the disease tra-  
182 jectory, optimal resource allocation and better understanding of the transmission process. In the  
183 current study we modelled the COVID 19 cases out of the number of tests as a function of time  
184 using semi-parametric approach. This approach allows us to adjust for or take into account the  
185 number of tests performed, which when ignored may lead to erroneous conclusions. Also, this  
186 method allows us to overcome the problem to modelling the number of cases alone and to take  
187 into account the strong relationship between the number of cases and the number of tests which  
188 can lead to a misleading result and therefore affect government policy regarding measures and  
189 precautions needed.

190 The positive testing rate decreased from early March when the disease was first observed  
191 until early May when it kept on increasing. In July, the infection reached its peak and then consis-  
192 tently decreased, indicating that the intervention strategy was effective. From mid August, 2020,  
193 the rate of change of the positive testing rate indicates the decline in the positive testing rate is  
194 slowing down suggesting that a less effective intervention is currently implemented. The moving  
195 average is another measure that can be used to understand the rate of infection, but unlike the pos-  
196 itive testing rate, the moving average commonly uses partial information since there is always loss  
197 of information on both tails. In our case, the same result was obtained using both measures.

198 The rate of infection can be used as an indicator for the evolution of the outbreak over time  
199 and to reveal new trends in the outbreak. One could also extend our approach by modeling jointly  
200 the number of tests and number of positive cases. These results need to be interpreted under the  
201 background of changing COVID-19 testing strategies in the country. When the positive testing rate  
202 is tracked in real time, it can provide useful guidance to policy makers

## 203 **References**

- 204 G. Chowell, A. Tariq, and J. Hyman. A novel sub-epidemic modeling framework for short-term  
205 forecasting epidemic waves. *BMC Med*, 17:164, 2019.
- 206 J. Claesen<sup>1</sup>, L. Clement, Z. Shkedy, M. Foulquie-Moreno, and T. Burzykowski. Simultaneous  
207 mapping of multiple gene loci with pooled segregants. *PLoS ONE*, 8:2, 2013.
- 208 Y.-H. Hsieh and C. Chen. Turning points, reproduction number, and impact of climatological  
209 events for multi-wave dengue outbreaks. *Tropical Medicine and International Health*, 14:628–  
210 638, 2009.
- 211 Our world in Data. The positive rate: A crucial metric for understand-  
212 ing the pandemic. [https://ourworldindata.org/coronavirus-testing#  
213 the-positive-rate-a-crucial-metric-for-understanding-the-pandemic/](https://ourworldindata.org/coronavirus-testing#the-positive-rate-a-crucial-metric-for-understanding-the-pandemic/), 2020.  
214 [Online; accessed 21-October-2020].
- 215 R Core Team. *R: A Language and Environment for Statistical Computing*. R Foundation for  
216 Statistical Computing, Vienna, Austria, 2020. URL <https://www.R-project.org/>.
- 217 T. Reddy, Z. Shkedy, C. Rensburg, H. Mwambi, P. Debba, K. Zuma, and S. Manda. South africa’s  
218 trajectory to 100000 cases and what lies ahead: data-driven, real-time prediction of total number  
219 of reported cases and deaths. *Submitted for publication to BMC Medical research methodology*,  
220 2020.
- 221 K. Roosa, Y. Lee, R. Luo, A. Kirpich, R. Rothenberg, J. Hyman, P. Yan, and G. Chowell. Short-  
222 term forecasts of the covid-19 epidemic in guangdong and zhejiang, china. *Clinical Medicine*,  
223 9(596):13–23, 2020.
- 224 D. Ruppert, M. Wand, and R. Carroll. *Semi Parametric Regression*. Cambridge University Press,  
225 2003.
- 226 C. Sebrango-Rodríguez, D. Martínez-Bello, L. Sánchez-Valdés, P. Thilakarathne, E. Del Fava,  
227 P. Van Der Stuyft, A. López-Quílez, and Z. Shkedy. Real-time parameter estimation of zika  
228 outbreaks using model averaging. *Epidemiology & Infection*, 145:2313–2323, 2017.
- 229 C. Shen. Logistic growth modelling of covid-19 proliferation in china and its international impli-  
230 cations. *International Journal of Infectious Diseases*, 96:582–589, 2020.
- 231 A. Tariq, Y. Lee, K. Roosa, S. Blumberg, P. Yan, S. Ma, and G. Chowell. Real-time monitoring

- 232 the transmission potential of covid-19 in singapore. *BMC Medicine*, 18:166, 2020.
- 233 S. Wood. *Generalized Additive Models: An Introduction with R*. Chapman and Hall/CRC, 2  
234 edition, 2017.
- 235 World Health Oragnisation. Who coronavirus disease (covid-19) dashboard. [https://covid19.](https://covid19.who.int/)  
236 [who.int/](https://covid19.who.int/), 2020. [Online; accessed 12-October-2020].
